# Supplementary material for: Anti-Photoaging Effect of Jawoongo via Regulating Nrf2/ARE and TGF-β/Smad Signaling in In Vitro Photoaging Model
Source: MDPI journal article supplement (doi:10.3390/app131810425), 2023-09-18
Supplement: s1 [file s1]

**Table S1. Primers used for RT-PCR**

| NCBI accession code | Primer <sup>a</sup> | Sequence (5'-3')           |
|---------------------|---------------------|----------------------------|
| XM_011526432.2      | Sense               | ACC ACA GTC CAT GCC ATC AC |
|                     | Antisense           | CCA CCA CCC TGT TGC TGT AG |
| NM_001145938.2      | Sense               | TGC GCA CAA ATC CCT TCT AC |
|                     | Antisense           | TTC AAG CCC ATT TGG CAG TT |
| XM_003828377.4      | Sense               | CCC GAG GTT GGA CCT ACA AG |
|                     | Antisense           | CTT CCC CGT CAC CTC CAA TC |
| NM_000088.4         | Sense               | CTC GAG GTG GAC ACC CT     |
|                     | Antisense           | CAG CTG GAT GGC CAC ATC GG |
